# Supplementary material for: Shape engineering of polystyrene particles from spherical to raspberry-like to hollow flower-like via one-step non-surfactant self-templating polymerization of styrene in ethanol–water mixtures
Source: Royal Society of Chemistry journal article supplement (doi:10.1039/d0ra00005a), 2020-01-01
Supplement: d0ra00005a1.pdf [file d0ra00005a1.pdf]

# **Shape Engineering of Polystyrene Particles from Spherical to Raspberry-like to Hollow Flower-like via One-Step Soap-free Emulsion Polymerization of Styrene in Ethanol-water Mixtures**

Xuechen Xiang, Zhe Chen, Dongfang Ren, Jiaqiong Xu, Xiaofeng Li, Zixin Ye, Ning Chen, Qiming Chen\*, Shiyu Ma\*

*Research Center of Water Resources and Interface Science,*

*School of Chemistry and Molecular Engineering, East China Normal University, No.500,*

*Dongchuan Rd., Shanghai 200241, P.R. China*

E-mail: qmchen@chem.ecnu.edu.cn, syma@chem.ecnu.edu.cn

## **Contents**

|                                                                                                                                                                                         |   |
|-----------------------------------------------------------------------------------------------------------------------------------------------------------------------------------------|---|
| S.1 TEM images of PS particles prepared with $R=1/15.03/17.86$ ( $V_M:V_I=1:0.15$ ) at 250 rpm.                                                                                         | 2 |
| S.2 DLS results for the as-prepared PS particles.                                                                                                                                       | 2 |
| S.3 TEM images of PS particles prepared with $V_M:V_I=1:9$ in different system.                                                                                                         | 2 |
| S.4 TEM images of PS particles prepared with $V_M:V_I=1:15$ in different system.                                                                                                        | 3 |
| S.5 DLS results for oil droplets in the system of $V_M:V_E=1:13$ at different aging times.                                                                                              | 3 |
| S.6 DLS results for oil droplets in the system of $V_M:V_E=1:15$ at different aging times.                                                                                              | 4 |
| S.7 DLS results of the time corresponding to the small peak appeared in systems with different ratios of $V_M$ to $V_I$ : (a) $V_M:V_I=1:9$ ; (b) $V_M:V_I=1:13$ ; (c) $V_M:V_I=1:15$ . | 4 |

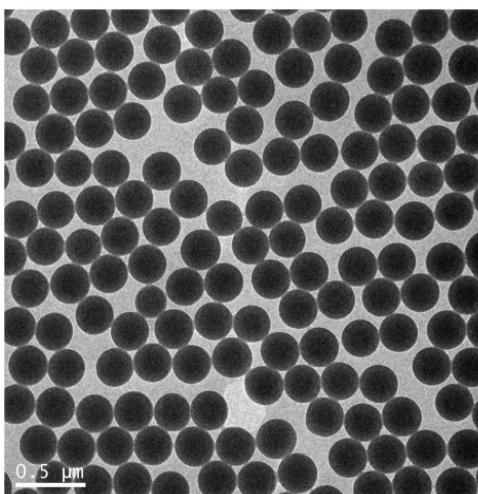

**Fig. S1.**† TEM of PS particles prepared with  $R= 1/15.03/17.86$  ( $V_M:V_I=1:0.15$ ) at 250 rpm.

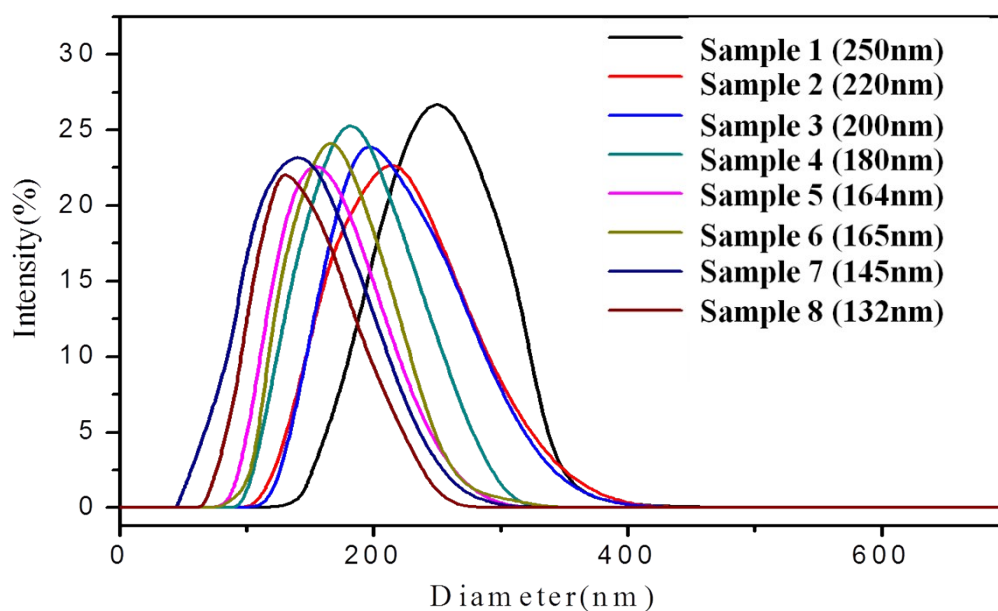

**Fig. S2.**† DLS results for the as-prepared PS particles.

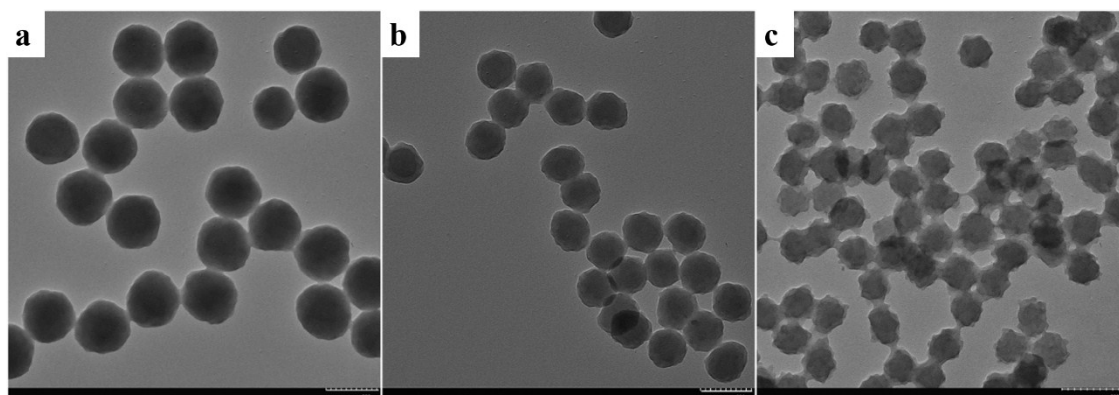

**Fig. S3.**† TEM images of the PS particles prepared with  $V_M:V_I=1:9$  in different systems: (a) styrene/water/methanol ternary system; (b) styrene/water/ isopropanol ternary system; (c) styrene/water/ tert-butanol ternary system.

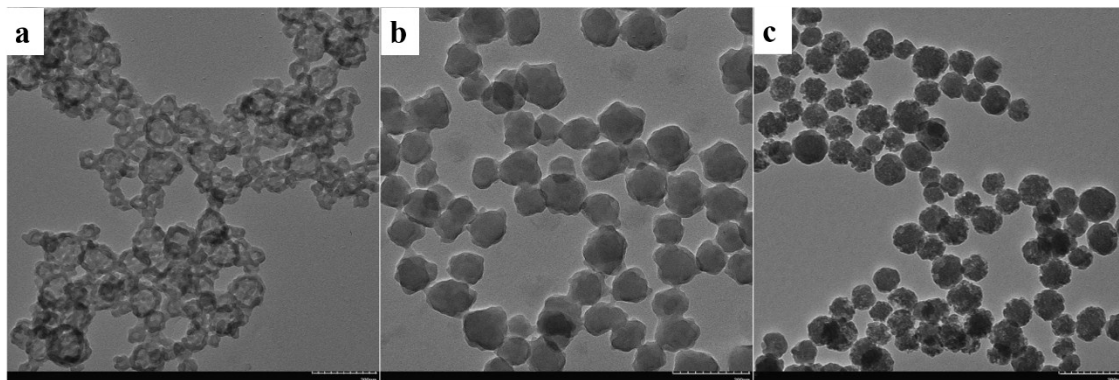

**Fig. S4.†** TEM images of the PS particles prepared with  $V_M:V_I=1:15$  in different systems: (a) styrene/water/methanol ternary system; (b) styrene/water/ isopropanol ternary system; (c) styrene/water/ tert-butanol ternary system.

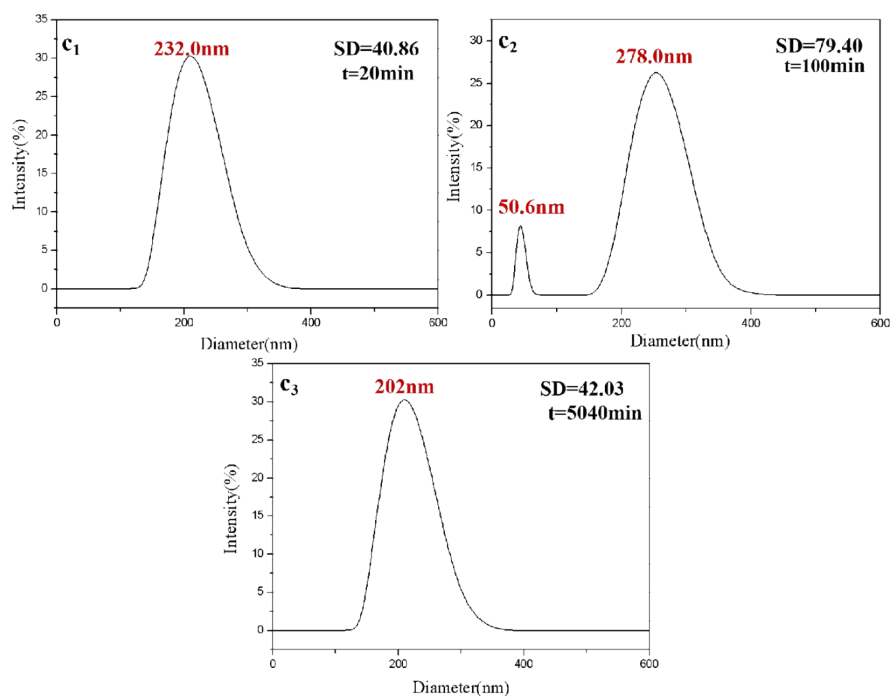

**Fig. S5.†** DLS results for oil droplets in the system with  $V_M:V_E=1:13$  at different aging times.

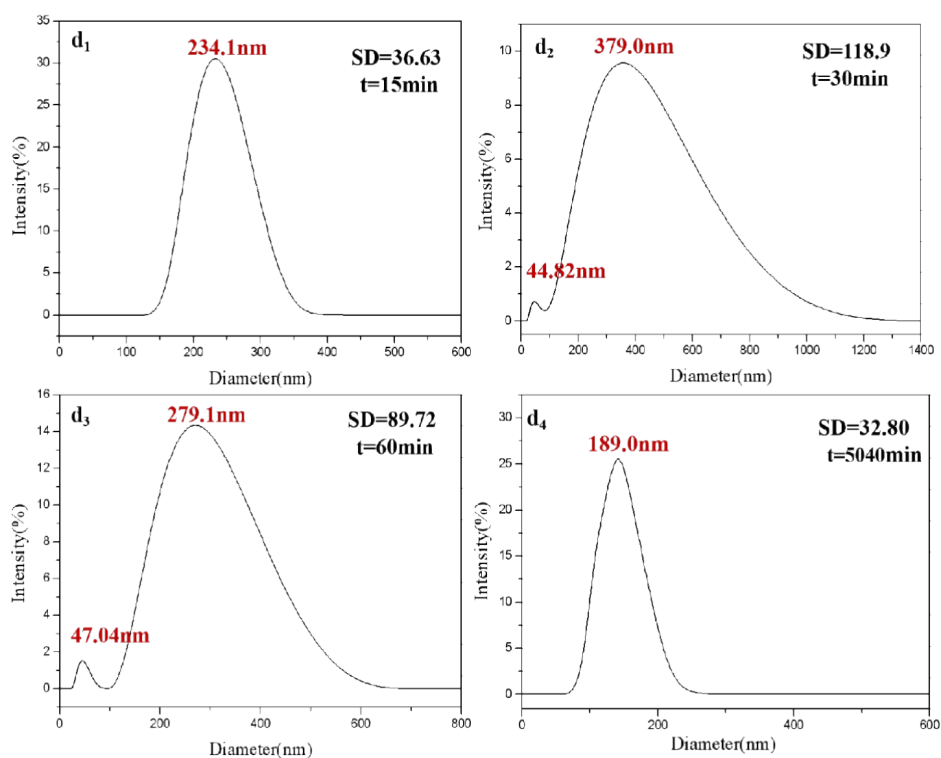

Fig. S6.† DLS results for oil droplets in the system with  $V_M:V_E=1:15$  at different aging times.

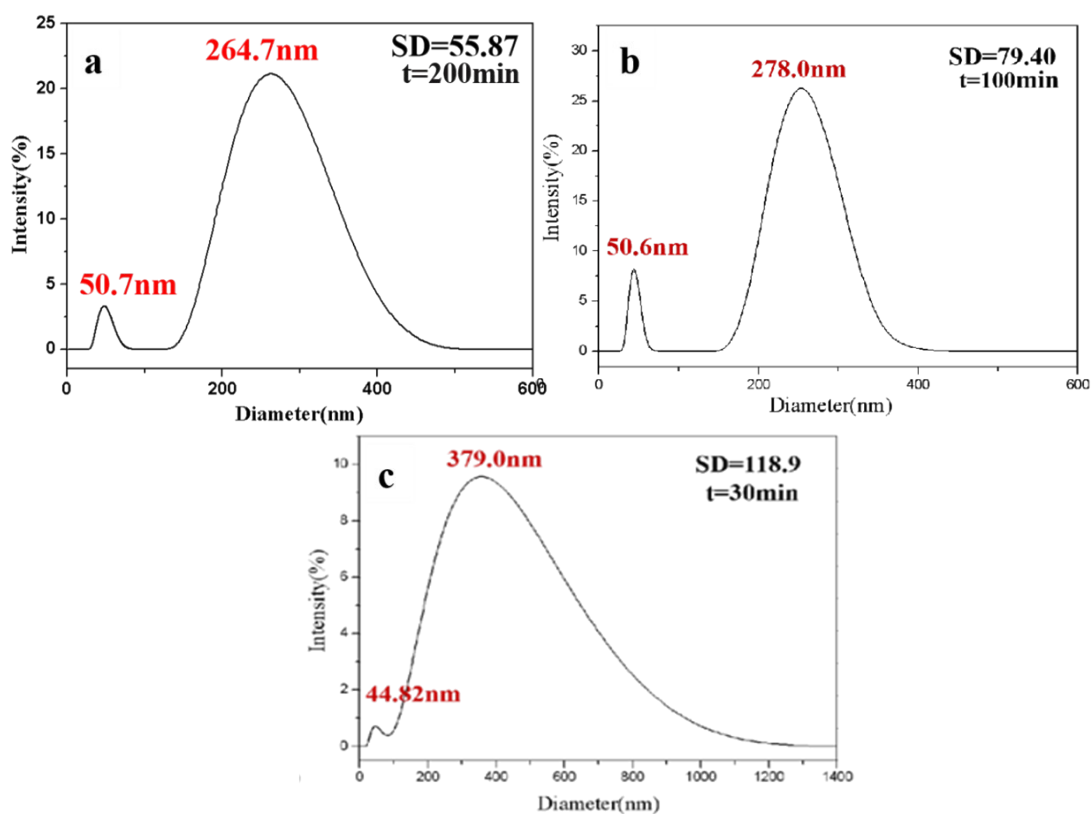

**Fig. S7.†** DLS results of the time corresponding to the small peak appeared in systems with different ratios of  $V_M$  to  $V_I$ : (a)  $V_M:V_I=1:9$ ; (b)  $V_M:V_I=1:13$ ; (c)  $V_M:V_I=1:15$ .
